# Supplementary material for: Blocking type I interferon signaling enhances T cell recovery and reduces HIV-1 reservoirs
Source: JCI journal article supplement (doi:10.1172/jci90745), 2016-12-11
Supplement: sd1 [file 1]

**A**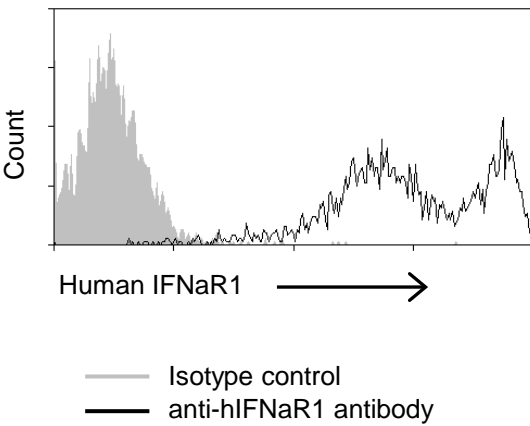**B**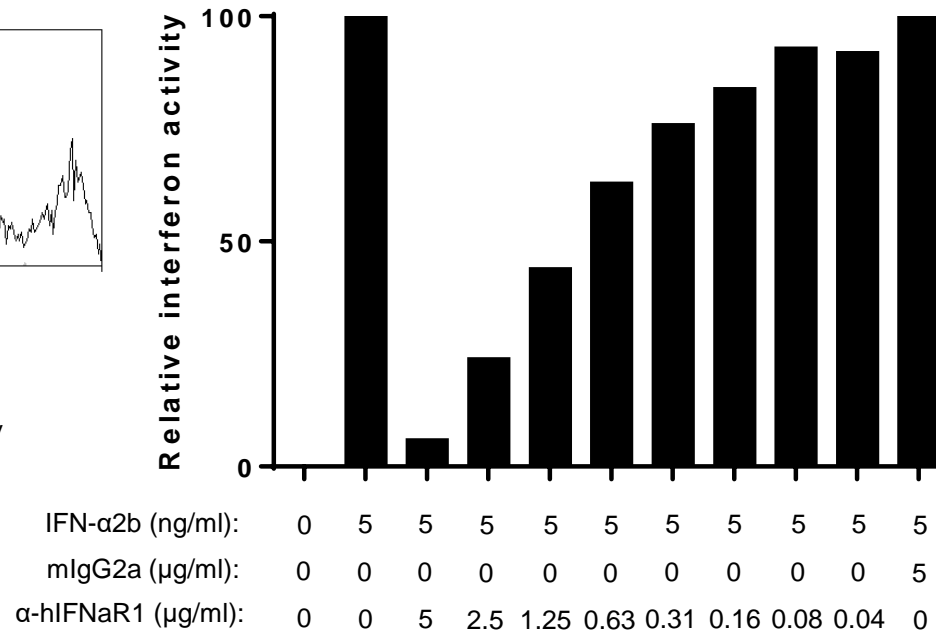

**Supplementary Figure 1. The α-IFNαR1 antibody can bind human IFNαR1 and block type I interferon signaling.** (A)

Histogram show the binding of anti-human IFNαR1 antibody to 293T cells transfected with plasmid encoding human IFNαR1. mIgG2a was used as isotype control. (B) The IFN-I reporter cell line was stimulated with human IFN-α2b in the present of anti-human IFNαR1 or isotype control mIgG2a antibody. Data show IFN activity after anti-human IFNαR1 treatment relative to samples with IFN-α2a treatment only. The half maximal inhibitory concentration (IC50) is 1.04μg/ml. (C) Human PBMCs were pre-incubated with anti-human IFNαR1 antibody for 1 hour and then stimulated with human IFNα2b for 5 hours. Data show the relative expression of human ISG15 and Mx2 detected by quantitative RT-PCR.

**C**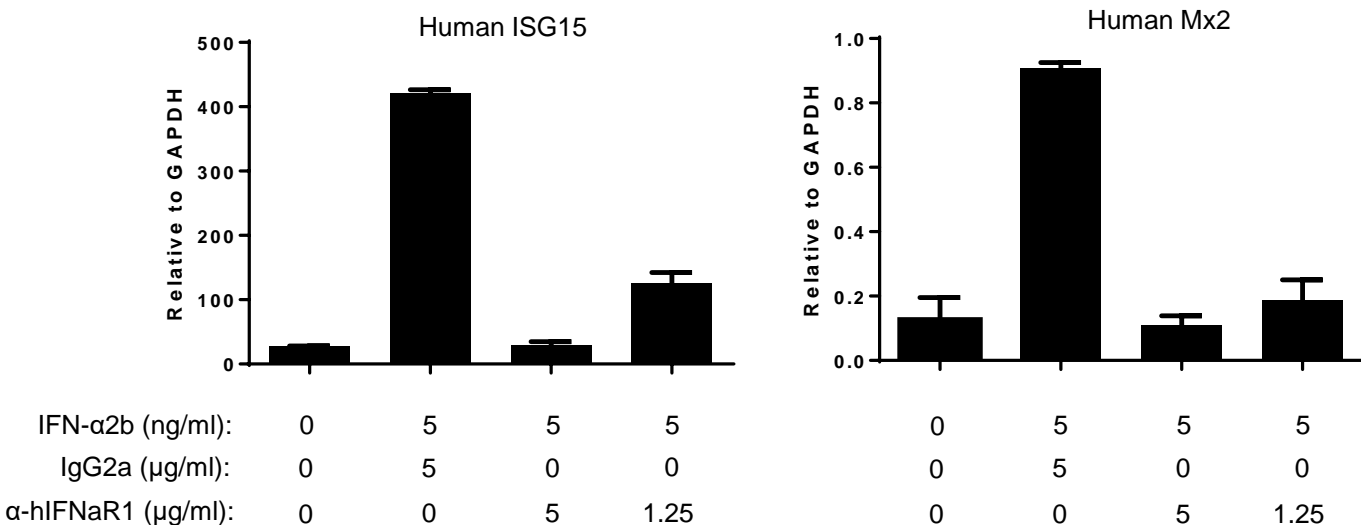

A

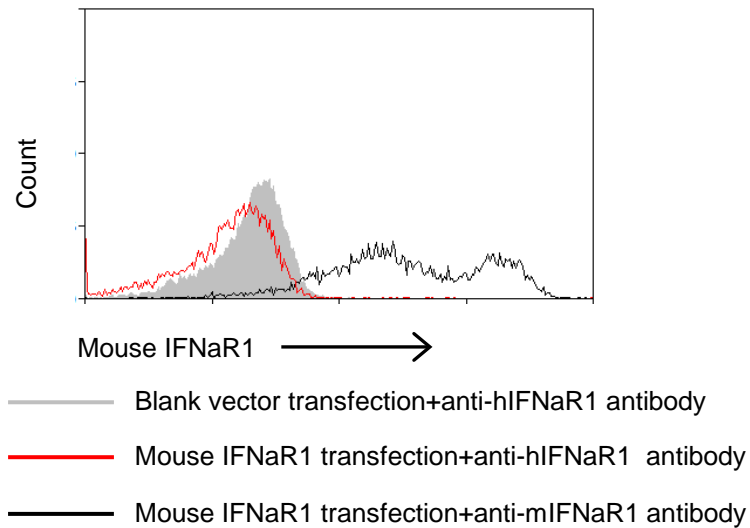

**Supplementary Figure 2. The anti-human IFNαR1 antibody do not bind to mouse IFNαR1 or block IFN-α mediated signaling in mouse cells. (A)** 293T cells were transfected with blank plasmid and plasmid encoding mouse IFNαR1, then incubated with anti-human IFNαR1 antibodies to test the binding of the anti-human IFNαR1 antibody to mouse IFNαR1. anti-mouse IFNαR1 antibody was used as positive control. (B)

Splenocytes from mouse were pre-incubated with anti-human IFNαR1 antibody or anti-mouse IFNαR1 antibody for 1 hour and then stimulated with mouse IFNα for 4 hours. Data show the relative expression of mouse ISG15 and Mx2 detected by quantitative RT-PCR.

B

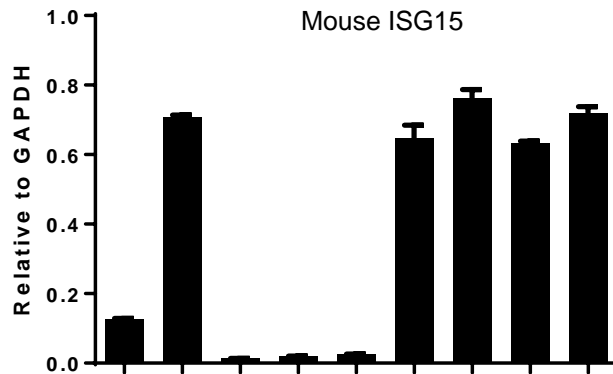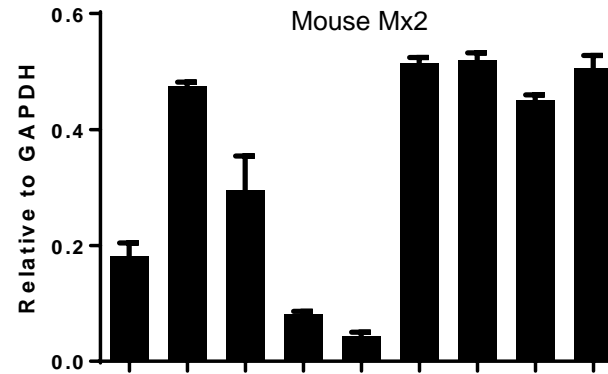

|                      |   |    |   |   |    |    |   |   |
|----------------------|---|----|---|---|----|----|---|---|
| Mouse IFN-α (ng/ml): | 0 | 1  | 1 | 1 | 1  | 1  | 1 | 1 |
| IgG1 (μg/ml):        | 0 | 10 | 0 | 0 | 0  | 0  | 0 | 0 |
| α-mIFNαR1 (μg/ml):   | 0 | 0  | 1 | 3 | 10 | 0  | 0 | 0 |
| IgG2a (μg/ml):       | 0 | 0  | 0 | 0 | 0  | 10 | 0 | 0 |
| α-hIFNαR1 (μg/ml):   | 0 | 0  | 0 | 0 | 0  | 0  | 1 | 3 |

|   |    |   |   |    |    |   |   |    |
|---|----|---|---|----|----|---|---|----|
| 0 | 1  | 1 | 1 | 1  | 1  | 1 | 1 | 1  |
| 0 | 10 | 0 | 0 | 0  | 0  | 0 | 0 | 0  |
| 0 | 0  | 1 | 3 | 10 | 0  | 0 | 0 | 0  |
| 0 | 0  | 0 | 0 | 0  | 10 | 0 | 0 | 0  |
| 0 | 0  | 0 | 0 | 0  | 0  | 1 | 3 | 10 |

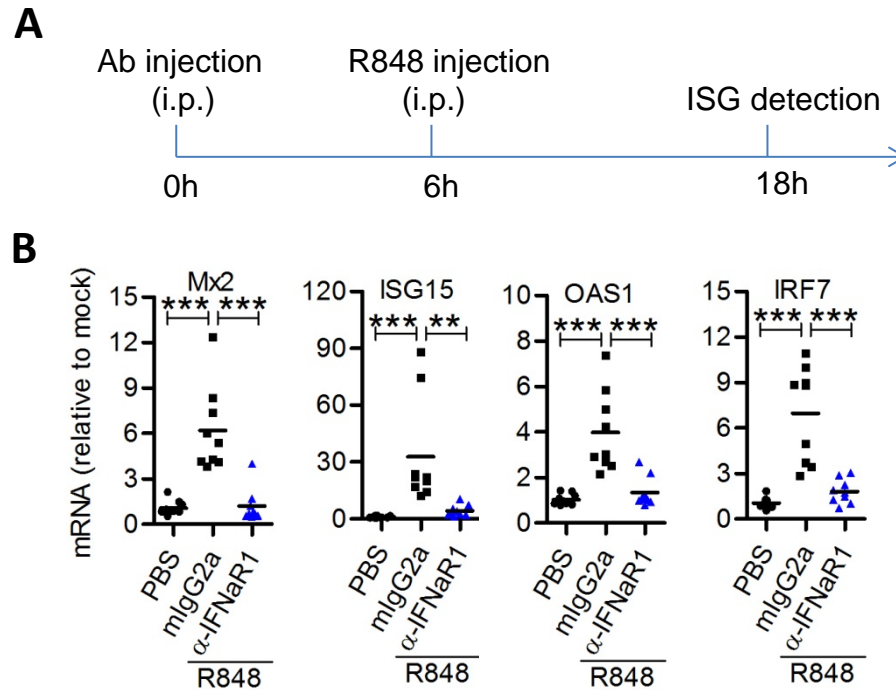

**Supplemental Figure 3. Anti-IFNaR1 mAb efficiently block R848 induced ISGs *in vivo* in humanized mice.**

**(A)** Schematic diagram of the experimental design. Humanized mice were pretreated with PBS , Isotype control (mouse IgG2a) or  $\alpha$ -IFNaR1 antibody (200ug/mouse, intraperitoneal injection), and 6 hours later, the mice received PBS or R848 (20ug/mouse, intraperitoneal injection) treatment. At 18 hours, peripheral blood cells were collected for analysis. **(B)** The relative mRNA levels of human Mx2, ISG15, OAS-1, and IRF7 were detected by real-time PCR. Shown are combined data of two independent experiments (PBS, n=10; R848+mlgG2a, n=9; R848+  $\alpha$ -IFNaR1, n=9 ) with mean values  $\pm$  s.e.m. \*P < 0.05, \*\*P < 0.01, \*\*\*P < 0.001. One-way analysis of variance (ANOVA) and Bonferroni's post hoc test.

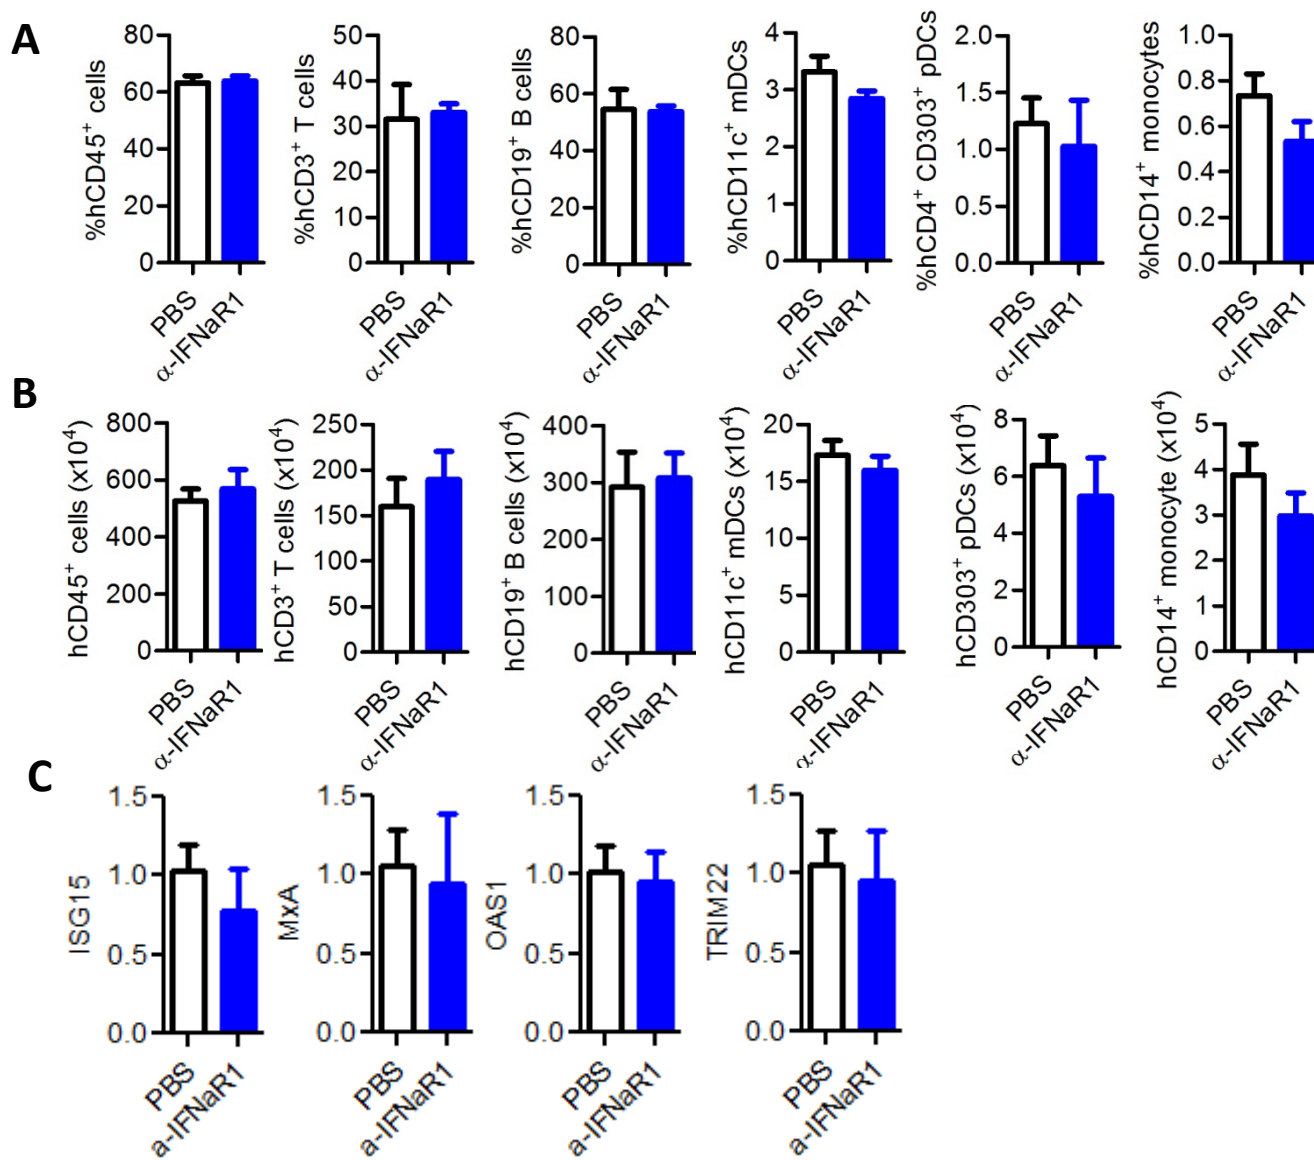

**Supplemental Figure 4. Anti-IFN $\alpha$ R1 mAb treatment *in vivo* does not affect human immune cell percentage and number in humanized mice.**

Humanized mice were treated with PBS or  $\alpha$ -IFN $\alpha$ R1 mAb (200ug/mouse, i.p.). Mice were sacrificed 24 hours later. The percentages (**A**) and numbers (**B**) of human total immune cells (hCD45<sup>+</sup>), T cells (hCD45<sup>+</sup> CD3<sup>+</sup>), B cells (hCD45<sup>+</sup> CD19<sup>+</sup>), myeloid DCs (hCD45<sup>+</sup> CD3<sup>-</sup> CD19<sup>-</sup> CD14<sup>-</sup> CD11c<sup>+</sup>), plasmacytoid DCs (hCD45<sup>+</sup> CD3<sup>-</sup> CD19<sup>-</sup> CD11c<sup>-</sup> CD14<sup>-</sup> CD303<sup>+</sup>) and monocytes (hCD45<sup>+</sup> CD14<sup>+</sup>) in the spleen were shown. (**C**) Relative mRNA levels of OAS1 and IRF-7 in splenocytes were detected by realtime PCR. Shown are data from one experiment (PBS, n=3;  $\alpha$ -IFN $\alpha$ R1, n=3) with mean values  $\pm$  s.e.m.

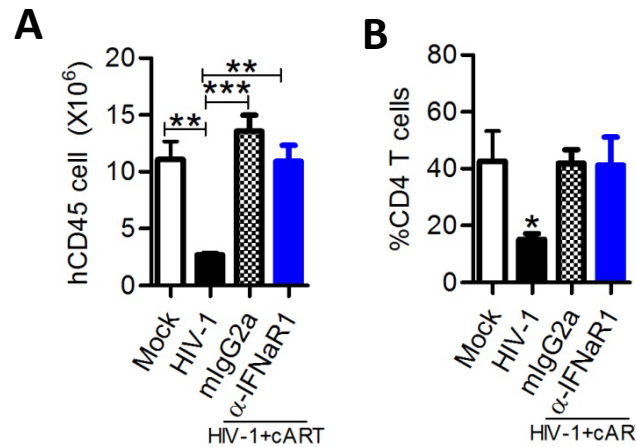

### Supplemental Figure 5. cART rescue human immune cell number.

Humanized mice were treated as in Fig.4a. Mice were sacrificed at 12 wpi. **(A)** Summarized data show numbers of total human leukocytes in spleen. **(B)** Summarized data show percentage of human CD4 T cells in total human leukocytes in spleen. Shown are combined data from two independent experiments with mean values  $\pm$  s.e.m. (mock, n=7; HIV-1, n=7; HIV-1 + cART + mIgG2a, n=8; HIV-1 + cART +  $\alpha$ -IFN $\alpha$ R1, n=8). \*P < 0.05, \*\*P < 0.01, \*\*\*P < 0.001. One-way analysis of variance (ANOVA) and Bonferroni's post hoc test.

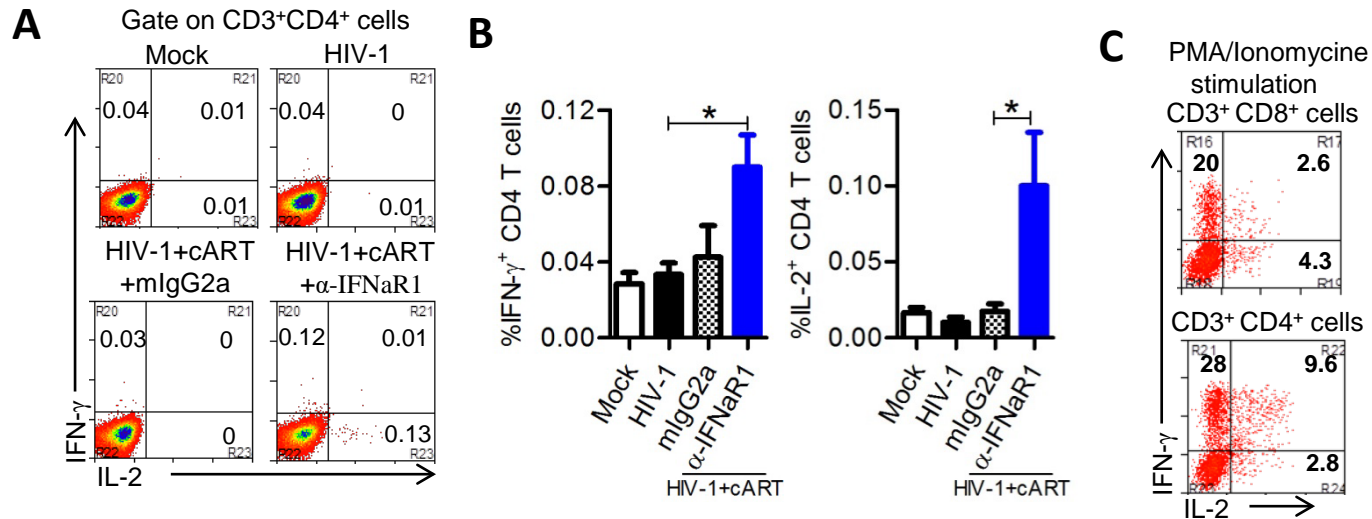

### Supplemental Figure 6. IFNaR blockade in cART-suppressed infection reverses HIV-specific T cell function.

Humanized mice were treated as in Fig.4a. Splenocytes were stimulated *ex vivo* with HIV Gag peptide pools for 8 hours (BFA was added at 3 hours) followed by intracellular cytokine staining. **(A)** Representative dot plot show IFN- $\gamma$  and IL-2 producing CD4 T cells. **(B)** Summarized data show percentages of IFN- $\gamma$  and IL-2 producing CD4 T cells after Gag peptide pools stimulation. **(C)** Mix splenocytes from the mice were stimulated with PMA/Ionomycine as positive control. Representative dot plot show IFN- $\gamma$  and IL-2 producing CD8 and CD4 T cells 4 hours after PMA/Ionomycine. Shown are combined data **(B)** from two independent experiments with mean values  $\pm$  s.e.m. (mock, n=7; HIV-1, n=7; HIV-1 + cART + mIgG2a, n=8; HIV-1 + cART +  $\alpha$ -IFNaR1, n=8). \*P < 0.05, \*\*P < 0.01, \*\*\*P < 0.001. One-way analysis of variance (ANOVA) and Bonferroni's post hoc test.
